# Supplementary material for: Cost-effectiveness of Dental Workforce Expansion Through the National Health Service Corps and Its Association With Oral Health Outcomes Among US Children
Source: PubMed Central journal article supplement (PMC10024205; doi:10.1001/jamahealthforum.2023.0128), 2023-03-17
Supplement: jamahealthforum-e230128-s001.pdf [file jamahealthforum-e230128-s001.pdf]

## Supplemental Online Content

Choi SE, Shen Y, Wright DR. Cost-effectiveness of dental workforce expansion through the National Health Service Corps and its association with oral health outcomes among US children. *JAMA Health Forum*. 2023;4(3):e230128.  
doi:10.1001/jamahealthforum.2023.0128

**eMethods 1.** Model simulation

**eMethods 2.** Risk of dental caries and associated oral health outcomes

**eMethods 3.** National Health Service Corp (NHSC) program and dentist supply

**eMethods 4.** Relationship between dentist supply with dental utilization and risk of dental caries

**eMethods 5.** Model parameters for one-way or probabilistic sensitivity analysis

**eFigure 1.** Model validation for dental caries

**eFigure 2.** Cost-effectiveness Acceptability Curve

**eTable 1.** Demographic distribution by dental HPSAs and urban/rural status

**eTable 2.** Cost and disutility weights

**eTable 3.** Baseline prevalence of tooth decay

**eTable 4.** Baseline dental utilization

This supplemental material has been provided by the authors to give readers additional information about their work.

## **eMethods 1. Model Simulation**

We developed a microsimulation model, which simulates dental care use and risk of tooth decay at the level of the individual. The model is stochastic by sampling from probability distributions of input parameters to generate a distribution of outcomes. The model is run in discrete time steps over the life-course from 2022, where the simulated policy changes are introduced at the start of year 202. A model diagram is illustrated in Figure 1.

We classified synthetic population in this model by combinations of a few key demographic characteristics: age (2-5, 6-12, 13-19 years old), sex, race/ethnicity [National Health and Nutrition Examination Survey (NHANES) categories of non-Hispanic white, non-Hispanic black, Hispanic (Mexican-American or other)], and income (relative to the FPL, adjusted for household size), and residing in counties with dental professional shortage (whole, partial, or none of the county designated) within urban/rural regions. These characteristics were obtained from NHANES data linked to dentist supply information obtained from Health Resources and Services Administration (HRSA). Because NHANES is repeated cross-sectional, we had to construct synthetic population to account for the weights. 10,000 individuals were generated, for each cohort defined by the combinations of these characteristics. The model was re-run 10,000 times while repeatedly Monte Carlo sampling from the probability distributions of all input parameters to capture uncertainties in our estimates.<sup>1</sup>

Baseline dental utilization (annual dental visit) and prevalent tooth decay cases were assigned to each simulated individual by repeated Monte Carlo sampling from the probability distributions of each of these variables in NHANES, specific to each demographic group. For dental caries, tooth-level binary indicators for caries incidence were assigned to each simulated individual and

summed to calculate the total number of decayed and/or filled teeth for the simulated individuals. To account for individuals aging, we tracked the age of each simulated individual over the simulation period, and updated each individual's probability to utilize dental care and risk of tooth decay to account for their age-specific utilization and health risk by preserving the individual's rank in the population distribution to account for the stability of risk over time.

## eMethods 2. Risk of dental caries and associated oral health outcomes

Risk of dental caries was modeled as a function of age, race/ethnicity, and income. Below model estimates were adjusted to calibrate to NHANES data (Supplemental Figure S1)

| den_caries     | Coef.     | Linearized<br>Std. Err. | t      | P> t  | [95% Conf. Interval] |           |
|----------------|-----------|-------------------------|--------|-------|----------------------|-----------|
| -----          |           |                         |        |       |                      |           |
| agecat         |           |                         |        |       |                      |           |
| 6-12           | 1.77322   | .0910509                | 19.48  | 0.000 | 1.590049             | 1.956391  |
| 13-19          | 1.931936  | .1166236                | 16.57  | 0.000 | 1.69732              | 2.166553  |
| 20-29          | 2.522004  | .1328357                | 18.99  | 0.000 | 2.254773             | 2.789235  |
| racecat        |           |                         |        |       |                      |           |
| NH White       | -.5726073 | .1406452                | -4.07  | 0.000 | -.8555489            | -.2896656 |
| NH Black       | -.1553968 | .1546575                | -1.00  | 0.320 | -.4665276            | .1557339  |
| agecat#racecat |           |                         |        |       |                      |           |
| 6-12#NH White  | .0465048  | .1553039                | 0.30   | 0.766 | -.2659264            | .358936   |
| 6-12#NH Black  | -.201083  | .186286                 | -1.08  | 0.286 | -.5758422            | .1736762  |
| 13-19#NH White | .3790678  | .1454771                | 2.61   | 0.012 | .0864057             | .6717299  |
| 13-19#NH Black | -.1800304 | .1741782                | -1.03  | 0.307 | -.5304316            | .1703709  |
| 20-29#NH White | .8320376  | .1902897                | 4.37   | 0.000 | .4492241             | 1.214851  |
| 20-29#NH Black | .1877936  | .2219161                | 0.85   | 0.402 | -.258644             | .6342312  |
| incomecat      |           |                         |        |       |                      |           |
| 130-300% FPL   | -.2159971 | .0669902                | -3.22  | 0.002 | -.3507639            | -.0812302 |
| >300% FPL      | -.5824465 | .0801787                | -7.26  | 0.000 | -.7437454            | -.4211477 |
| _cons          | -1.159482 | .0927506                | -12.50 | 0.000 | -1.346072            | -.9728916 |
| -----          |           |                         |        |       |                      |           |

Once individuals develop caries, the probability of caries being treated was 72% based on an analysis of NHANES.<sup>2</sup> For those with untreated caries, the probability of tooth loss was 76.6%,<sup>3</sup> and the probability of tooth abscess was 32.1%.<sup>4</sup>

### eMethods 3. National Health Service Corp (NHSC) program and dentist supply<sup>5</sup>

The National Health Service Corps (NHSC) supports qualified health care providers dedicated to working in underserved communities in urban, rural, and tribal areas. NHSC-approved sites provide care to individuals regardless of their ability to pay. As of September 30, 2020, there were 7,203 primary care HPSAs, 6,487 dental HPSAs, and 5,733 mental health HPSAs with 16,299 primary care medical, dental, and mental and behavioral health practitioners providing service nationwide in the following programs applied to dental practitioners.

**NHSC Scholarship Program (SP):** The NHSC SP provides financial support through scholarships, including tuition, other reasonable education expenses, and a monthly living stipend to health professions students committed to providing primary care in underserved communities of greatest need. Upon completion of training, NHSC scholars become salaried employees of NHSC-approved sites in underserved communities. Two years of commitment required.

**NHSC Loan Repayment Program (LRP):** The NHSC LRP offers fully trained clinicians the opportunity to receive assistance to pay off qualifying educational loans in exchange for service in a HPSA. In exchange for an initial two years of service, loan re-payers receive up to \$50,000 in loan repayment assistance. Two years of commitment required.

**NHSC Students to Service (S2S) LRP:** The NHSC S2S LRP provides loan repayment assistance of up to \$120,000 to allopathic and osteopathic medical students and dental students in their last year of school in return for a commitment to provide primary health care in rural and urban HPSAs of greatest need for three years.

**State Loan Repayment Program (SLRP):** The SLRP is a federal-state partnership grant program that requires a dollar-for-dollar match from the state that enters into loan repayment contracts with clinicians who practice in a HPSA in that state. Two years of commitment required.

#### NHSC Student Pipeline by Discipline as of 09/30/2020

| Disciplines                                               | Students     |
|-----------------------------------------------------------|--------------|
| Allopathic/Osteopathic Physicians                         | 950          |
| Dentists                                                  | 315          |
| Nurse Practitioners                                       | 78           |
| Physician Assistants                                      | 156          |
| Certified Nurse Midwives                                  | 28           |
| Total                                                     | 1,527        |
| <b>Proportion of dentists among NHSC student pipeline</b> | <b>0.206</b> |

#### NHSC Field Strength by Discipline as of 09/30/2020

| Disciplines                       | Clinicians |
|-----------------------------------|------------|
| Allopathic/Osteopathic Physicians | 2,304      |
| Dentists                          | 1,568      |

|                                                                           |              |
|---------------------------------------------------------------------------|--------------|
| Dental Hygienists                                                         | 428          |
| Nurse Practitioners                                                       | 3,082        |
| Physician Assistants                                                      | 1,324        |
| Nurse Midwives                                                            | 207          |
| Mental and Behavioral Health Professionals                                | 7,173        |
| Other State Loan Repayment Program Clinicians                             | 143          |
| Total                                                                     | 16,229       |
| <b>Proportion of dentists/dental hygienists among NHSC field strength</b> | <b>0.123</b> |

**Loan Repayments/Scholarships Awards Table**

|                                    |                |                 |
|------------------------------------|----------------|-----------------|
|                                    | Total - FY2020 | Dental - FY2020 |
| Loan Repayments                    | \$355,000,000  | 43,665,000      |
| State Loan Repayments              | \$15,000,000   | 1,845,000       |
| Scholarships                       | \$38,000,000   | 7,828,000       |
| Students to Service Loan Repayment | \$20,000,000   | 4,120,000       |

\* Dental award costs were estimated based on proportions of dentist/dental students in the field and student pipelines in 2020

**Total NHSC awards table as of 09/30/2020**

| Program                            | 2015         | 2016         | 2017         | 2018         | 2019         | 2020         | 2021         |
|------------------------------------|--------------|--------------|--------------|--------------|--------------|--------------|--------------|
| Scholarships                       | 196          | 205          | 181          | 222          | 200          | 150          | 149          |
| Scholarship Continuation           | 11           | 8            | 7            | 7            | 11           | 12           | 12           |
| Loan Repayment                     | 2934         | 3079         | 2554         | 3262         | 4012         | 4899         | 4160         |
| Loan Repayment Continuations       | 1841         | 2111         | 2259         | 2384         | 2385         | 2350         | 2350         |
| State Loan Repayment               | 620          | 634          | 535          | 625          | 812          | 625          | 594          |
| Students to Service Loan Repayment | 96           | 92           | 175          | 162          | 127          | 167          | 158          |
| <b>Total Awards</b>                | <b>5,698</b> | <b>6,129</b> | <b>5,711</b> | <b>6,662</b> | <b>7,547</b> | <b>8,203</b> | <b>7,423</b> |

**Total NHSC field strength table as of 09/30/2020**

| Program:       | 2015  | 2016  | 2017  | 2018  | 2019   | 2020   | 2021   |
|----------------|-------|-------|-------|-------|--------|--------|--------|
| Scholars       | 458   | 437   | 405   | 463   | 506    | 573    | 540    |
| Loan Repayment | 8,062 | 8,593 | 8,362 | 8,849 | 10,221 | 13,122 | 13,524 |

|                                    |              |               |               |               |               |               |               |
|------------------------------------|--------------|---------------|---------------|---------------|---------------|---------------|---------------|
| Students to Service Loan Repayment | 1,136        | 1,378         | 179           | 277           | 369           | 388           | 517           |
| State Loan Repayment               | 27           | 85            | 1,233         | 1,350         | 1,957         | 2,146         | 1,250         |
| <b>Total Field Strength</b>        | <b>9,683</b> | <b>10,493</b> | <b>10,179</b> | <b>10,939</b> | <b>13,053</b> | <b>16,229</b> | <b>15,831</b> |

\* Estimated dental NHSC awards and field strength based on proportions of dentist/dental students in the field and student pipelines in 2020.

|                                   | Number of awards | Field strength |
|-----------------------------------|------------------|----------------|
| Scholarship                       | 33               | 118            |
| Student to service loan repayment | 34               | 80             |
| Loan repayment                    | 801              | 1614           |
| State repayment                   | 77               | 264            |
| <b>Field to award ratio</b>       | <b>2.19</b>      |                |

→ Number of dental awards for each iteration in the simulation model was generated based on the number of dental awards in the past five years (2016-2020) by randomly selecting from a uniform distribution with min: 810 and max: 1170. Field to award ratio in 2020 was used to estimate the number of dentists in the field corresponding the number of dental awards.

Post-service retention rate (Percent of NHSC clinicians retained in service to the underserved for at least one year beyond the completion of their NHSC service commitment) was 80%

Default rate of NHSC Scholarship and Loan Repayment Program participants was ≤ 2.0%

#### eMethods 4. Relationship between dentist supply with dental utilization and risk of dental caries

| Author, Year                        | Study design    | Sample size | Study population                                                                                  | Dentist supply unit of analysis                       | Primary outcome                                                              | Findings                          |
|-------------------------------------|-----------------|-------------|---------------------------------------------------------------------------------------------------|-------------------------------------------------------|------------------------------------------------------------------------------|-----------------------------------|
| Guarnizo-Herreno, 2014 <sup>6</sup> | Cross-sectional | 63,825      | Children aged 1-17 whose mothers completed the National Survey of Children's Health (NSCH) survey | an additional dentist per 1000 population             | Odds of tooth decay                                                          | OR = 0.46; [95%CI: 0.23, 0.95]    |
| Heidenreich, 2015 <sup>7</sup>      | Cross-sectional | 604,885     | Children aged 0-17 enrolled in the Washington State Medicaid Program for ≥11 months               | an additional pediatric dentist per 10,000 population | Proportion of Medicaid-enrolled children who utilized preventive dental care | 0.0167 percentage point (p=0.047) |

In addition to the two published studies above, we tried to validate the findings using restricted NHANES data linked county-level HRSA data on dentist supply. A dataset including NHANES participants for the years 2011-2016 (N=29,919, below table provides population characteristics analyzed) was analyzed to measure the association between dentist supply and 1) annual dental utilization and 2) risk of dental caries.

|                |                       | Overall (N = 29,919) | Underserved (N = 27,570) | Non-underserved (N = 2,349) |
|----------------|-----------------------|----------------------|--------------------------|-----------------------------|
| Dentist supply | Dentists per 10,000   | 6.60 (0.20)          | 5.51 (0.81)              | 6.73 (0.23)                 |
| Race           | Hispanic              | 8351 (17.1%)         | 7963 (18.1%)             | 388 (8.5%)                  |
|                | Non-Hispanic White    | 9725 (61.9%)         | 8571 (60.2%)             | 1154 (76.8%)                |
|                | Non-Hispanic Black    | 7083 (12.1%)         | 6660 (12.7%)             | 423 (7.4%)                  |
|                | Other                 | 4760 (8.9%)          | 4367 (9.0%)              | 384 (7.4%)                  |
| Income         | Low (< 130% FPL)      | 10842 (26.8%)        | 10165 (27.8%)            | 677 (19.0%)                 |
|                | Middle (100-300% FPL) | 8008 (29.0%)         | 7387 (29.1%)             | 621 (27.9%)                 |



|             |                       |               |               |              |
|-------------|-----------------------|---------------|---------------|--------------|
|             | High (>300% FPL)      | 8392 (44.2%)  | 7473 (43.2%)  | 919 (53.1%)  |
| Insurance   | Private               | 13162 (59.6%) | 11939 (58.7%) | 1223 (67.1%) |
|             | Public                | 10497 (25.0%) | 9829 (25.4%)  | 668 (22.2%)  |
|             | Uninsured             | 4591 (15.38%) | 4266 (15.9%)  | 325 (10.8%)  |
| Education   | Less than High School | 6873 (17.4%)  | 6478 (17.8%)  | 385 (13.1%)  |
| Urban/Rural | Urban                 | 25456 (82.2%) | 23753 (83.9%) | 1703 (67.4%) |

For annual dental utilization, the outcome was a binary indicator for visiting a dental provider in the past 12 months. For the risk of dental caries, the outcome was having any signs of tooth decay (decayed, missing due to caries, or filled teeth). For both outcomes, we estimated logistic regression models, adjusting for all available explanatory variables; age, sex, race/ethnic (Hispanic, non-Hispanic White, non-Hispanic Black), income (<130%, 130-300%, >300 % FPL), insurance type, education attainment (less than high school education), and urban/rural designation.

In the fully adjusted regression models, with an additional dentist per 10,000, annual dental utilization increased with an odds ratio (OR) of 1.29 (95%CI: 1.08, 1.55), and the risk of dental caries decreased with an OR of 0.90 (95%CI: 0.76, 0.98). These results are consistent with the two previously published cross-sectional studies investigating the relationship between dentist supply and dental utilization/risk of dental caries. For our base-case parameters, we chose the most conservative parameters; OR of 0.90 (95%CI: 0.76-0.98) per additional dentist per 10,000 for the risk of dental caries and 0.0167 percentage point increase per additional dentist per 10,000 for dental utilization. Supplemental Text S6 provides ranges evaluated in one-way sensitivity analyses.

## eMethods 5. Model parameters for one-way or probabilistic sensitivity analysis

| Variable                                 | Base-case Value                             | Ranges used in one-way sensitivity analysis | Distribution in case we are doing PSA | Sources                  |
|------------------------------------------|---------------------------------------------|---------------------------------------------|---------------------------------------|--------------------------|
| <i>Disutility weights</i>                |                                             |                                             |                                       |                          |
| Dental caries                            | 0.01                                        | (0.0038 - 0.019)                            | Beta (20, 1700)                       | <sup>13-8</sup>          |
| <i>Effectiveness of the intervention</i> |                                             |                                             |                                       |                          |
| Dental caries                            | 0.90 per 10,000                             | (0.46 per 1000-0.98 per 10000)              | Beta (100,5)                          | <sup>6</sup> and Text S4 |
| Dental Utilization                       | 0.0167 percentage point increase per 10,000 | (1.12-1.2) odds ratio per 1,000             | Uniform (1.12-1.2)                    | <sup>14</sup>            |
| <i>Costs</i>                             |                                             |                                             |                                       |                          |
| Examination                              | 185 (10)                                    | (40 - 185)                                  | Gamma (20, 5)                         | <sup>11</sup>            |
| Dental caries                            | 530 (20)                                    | (290- 871)                                  | Gamma (28, 20)                        | <sup>10-12</sup>         |
| Abscess                                  | 818 (40)                                    | (276 -1087)                                 | Gamma (410, 2)                        | <sup>15</sup>            |
| Tooth extraction                         |                                             |                                             | Gamma (181, 50)                       | <sup>11</sup>            |
| <i>NHSC program</i>                      |                                             |                                             |                                       |                          |
| Field to Award Ratio                     | 2.20                                        | (1.71- 2.2)                                 | Uniform (1.71, 2.2)                   | <sup>5</sup>             |
| Program Cost per award                   | 60,802                                      | (47,090- 60,802)                            | Uniform (47089, 60802)                | <sup>5</sup>             |

Normal distributions were assumed for incidence and mortality model parameters.

### *Details on construction of ranges used in the sensitivity analysis*

For dental caries disutility weight, base-case value is from the Global Burdens of Disease (GBD).<sup>8</sup> The upper bound of the range came from the upper bound of the disability weights in the GBD study and the lower bound came from Kay et al<sup>13</sup>. Kay et al proposed using acute otitis media (a middle ear infection which also involves acute pain and hospital admissions) as an approximation to calculate the impact of tooth decay when it causes pain, due to the lack of utility estimates for the impact of dental caries from the literature. There were three utility estimates for otitis media (OM): 0.72, 0.79, 0.882 in Kay et al<sup>13</sup>. We used the highest utility weight of 0.882 (corresponding to the lowest disutility weight) in Kay et al<sup>13</sup> to calculate the lower bound for the disutility weight for dental caries. The steps to calculate the lower bound for the child with caries is as follows:

- Utility weight of extraction (estimated from OM): 0.882
- Duration of disutility: 12 weeks
- QALY loss for extraction:  $(1-0.882) \times (12/52)$  [difference between disutility of decayed and unerupted tooth, multiplied by the time for which pain/extraction impacted]
- Children with caries who experience acute pain: 13.91%
- Mean QALY loss per child with caries:  $(1-0.882) \times (12/52) \times .1391 = 0.0038$

For the effectiveness of the intervention on dental caries, the lower bound of the range came directly from the point estimate (an odds ratio of 0.46 per 1,000 children aged 1-10 years) in Guarnizo-Herreno et al<sup>6</sup>, assuming the same effect on all children in our simulation including those beyond this age group. In the base case, this value was assumed to be only applicable to the same age group and there was no effect among other age groups. The upper bound of the range

came from the upper bound of the 95% confidence interval, i.e. 0.90 (95%CI: 0.76, 0.98), in the NHANES analysis.

For the cost of tooth extraction, the lower (upper) bound of the range was calculated by the lowest 10<sup>th</sup> (the highest 95<sup>th</sup>) percentile from the national estimates of relevant dental procedure codes for general and pediatric practices in the ADA 2016 survey<sup>11</sup>, adjusted for inflation. In the one-way sensitivity analysis for cost of examination, the lower bound of the range were calculated by the lowest percentile from the national estimates of relevant dental procedure codes for general and pediatric practices in the ADA 2016 survey<sup>11</sup>, adjusted for inflation. The upper bound was the base case value as it is higher than the highest 95<sup>th</sup> percentile estimate form ADA 2016 survey.

For the cost of tooth abscess, the lower (upper) bound of the range was calculated by the lowest (the highest) 2020 quote estimates of relevant dental procedure codes from the United Healthcare Dental Fee Schedule.<sup>15</sup>

For the cost of dental caries, the lower (upper) bound of the range was calculated using the following method:

- Find the lowest 10<sup>th</sup> (the highest 95<sup>th</sup>) percentile from the national estimates of dental procedure codes relevant to dental fillings (resin-based composite) for general and pediatric practices in the ADA 2016 survey<sup>11</sup>, adjusted for inflation. Do the same for codes relevant to crowns (prefabricated stainless-steel crown).
- Multiply the lowest (highest) numbers from the previous step by Atkins et al<sup>12</sup>'s corresponding estimates for percentages of children with crowns only, with fillings only, or with both crowns and fillings to calculate the lower (upper) bound for the cost of dental caries.

For the two parameters related to NHSC programs, the lower bound of the ranges came from the 2019 values in the HRSA budget justification FY2021 document, adjusted for inflation.

**eFigure 1. Model internal validation for dental caries**

*Dental caries* (dental caries were calculated based on the number of decayed, missing due to caries, and filled teeth >1). Each colored line represents projected dental caries prevalence from one simulation model iteration. Plots show model outputs from 10,000 iterations with grey shaded area representing the 95% confidence intervals from a Centers for Disease Control and Prevention (CDC) report on dental caries prevalence in the US.

*Overall prevalence*

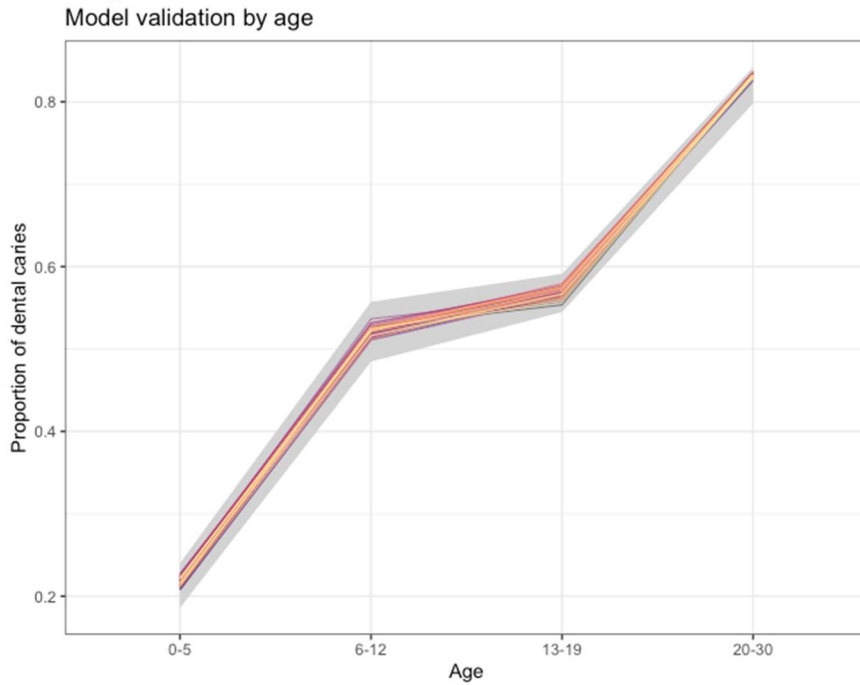

*Prevalence by age among Hispanic*

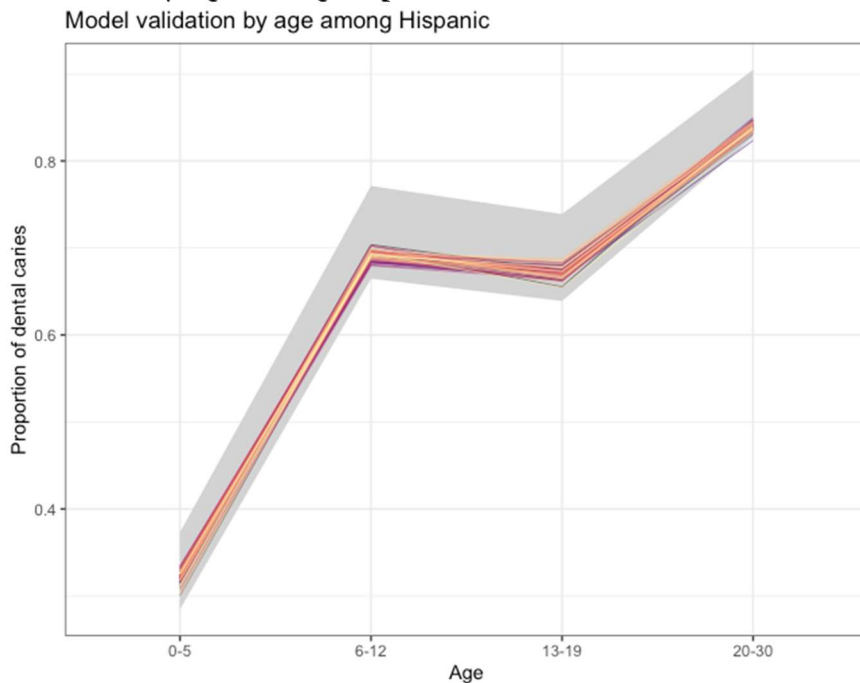

*Prevalence by age among Non-Hispanic White*

Model validation by age among Non-Hispanic White

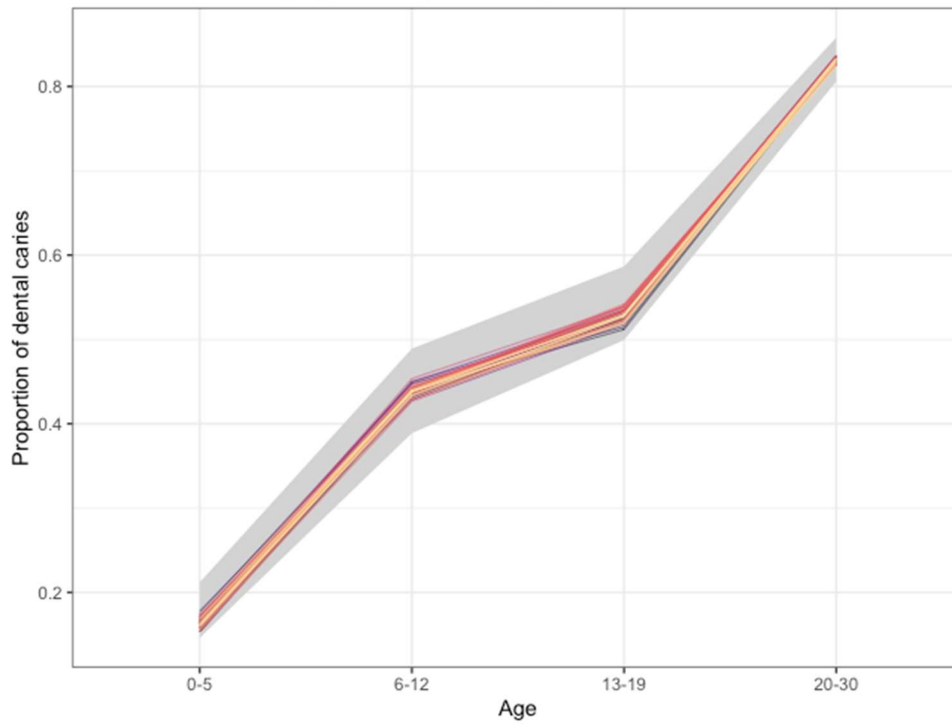

*Prevalence by age among Non-Hispanic Black*

Model validation by age among Non-Hispanic Black

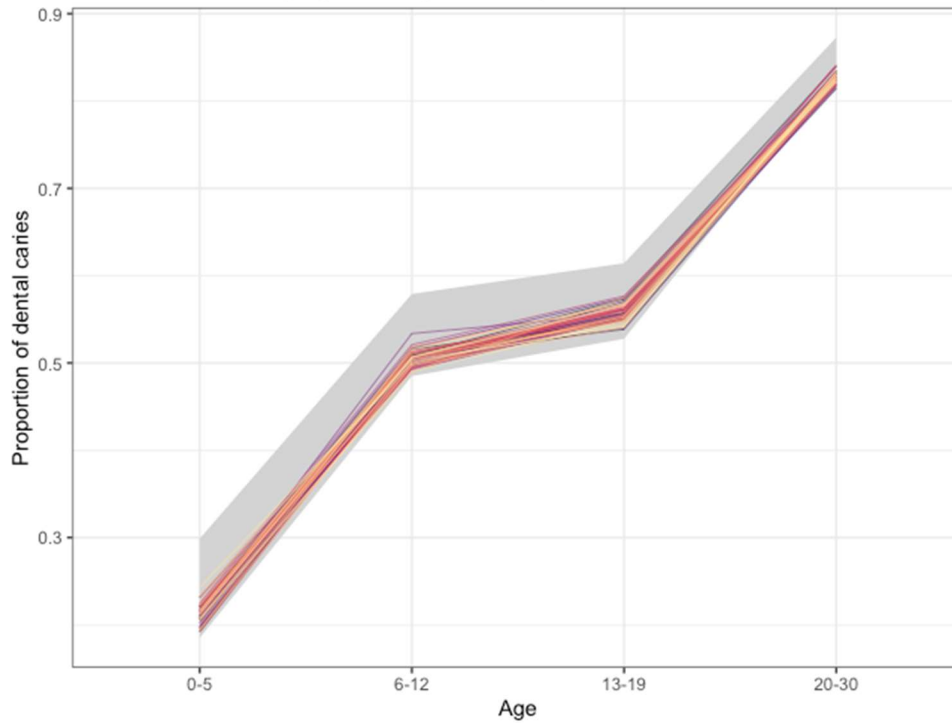

eFigure 2. Cost-effectiveness Acceptability Curve

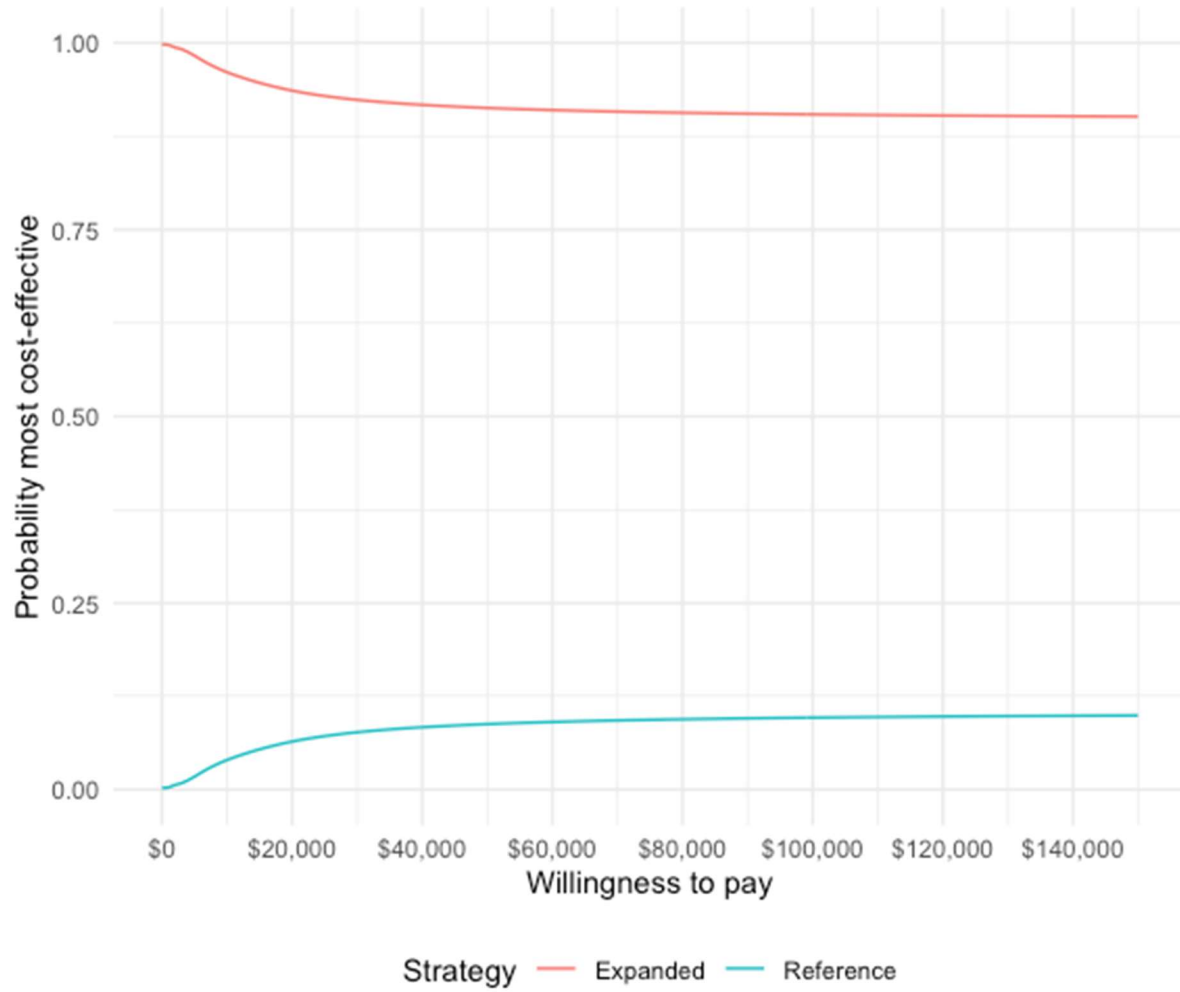

**eTable 1. Demographic distribution by dental HPSAs and urban/rural status (proportion)**

**Total number of children residing in dental HPSAs (partial and whole counties in short of supply): 14,688,009**

|                |              | Urban (81.6%)                   |                                     |                                  | Rural (18.4%)                   |                                     |                                   |
|----------------|--------------|---------------------------------|-------------------------------------|----------------------------------|---------------------------------|-------------------------------------|-----------------------------------|
|                |              | Dentist shortage – None (8.34%) | Dentist shortage – Partial (89.79%) | Dentist shortage – Whole (1.87%) | Dentist shortage – None (16.7%) | Dentist shortage – Partial (68.09%) | Dentist shortage – Whole (15.21%) |
| Age            | 0 to 5       | 0.2393                          | 0.2993                              | 0.3514                           | 0.219                           | 0.2724                              | 0.244                             |
|                | 6 to 12      | 0.3549                          | 0.3541                              | 0.3334                           | 0.3434                          | 0.3618                              | 0.4313                            |
|                | 13 to 19     | 0.4058                          | 0.3466                              | 0.3151                           | 0.4326                          | 0.3658                              | 0.3248                            |
| Sex            | Female       | 0.444                           | 0.4924                              | 0.4206                           | 0.4903                          | 0.4913                              | 0.4682                            |
| Race/ethnicity | Hispanic     | 0.1486                          | 0.3052                              | 0.6072                           | 0.0883                          | 0.1295                              | 0.2152                            |
|                | NH White     | 0.7143                          | 0.506                               | 0.3288                           | 0.8846                          | 0.8206                              | 0.7818                            |
|                | NH Black     | 0.1372                          | 0.1888                              | 0.0685                           | 0.0271                          | 0.0499                              | 0.0019                            |
| Income         | <=130% FPL   | 0.2518                          | 0.3802                              | 0.4218                           | 0.294                           | 0.3141                              | 0.2424                            |
|                | 130-300% FPL | 0.2480                          | 0.2939                              | 0.3832                           | 0.3445                          | 0.3271                              | 0.3502                            |
|                | >300% FPL    | 0.5002                          | 0.3259                              | 0.195                            | 0.3615                          | 0.3588                              | 0.4073                            |

These estimates are obtained by accessing restricted de-identified Federal Information Processing Standard (FIPS) identifiers associated with NHANES participants through a Federal Statistical Research Data Center and linked FIPS identifiers to county-level dentist supply and dental care HPSA (none, partial, and whole county designated with dental professional shortage) information.

**Disclaimer:** The findings and conclusions in this research are those of the authors and do not necessarily represent the views of the Research Data Center, National Center for Health Statistics, or Centers for Disease Control and Prevention.

Data collection for NHANES was approved by the NCHS Research Ethics Review Board. Analysis of de-identified data from the survey is exempt from the federal regulations for the protection of human research participants. Analysis of restricted data through the NCHS Research Data Center is also approved by the NCHS ERB.

**eTable 2. Cost and disutility weights**

| <b>Disease states</b> | <b>Disutility weights</b> | <b>Source</b> |
|-----------------------|---------------------------|---------------|
| Dental caries         | 0.01                      | 8             |
| Tooth extraction      | 0.073                     | 8             |
| Tooth abscess         | 0.069                     | 9             |

| <b>Procedure</b> | <b>Cost (USD)</b> | <b>Source</b> |
|------------------|-------------------|---------------|
| Examination      | 185 (10)          | 10-12         |
| Dental caries    | 530 (20)          | 10-12         |
| Tooth extraction | 181 (10)          | 10-12         |
| Tooth abscess    | 818 (45)          | 10-12         |



**eTable 3. Baseline prevalence of tooth decay**

|        |                |        | <6   | <6   | 6 to 12 | 6 to 12 | 13 to 19 | 13 to 19 |
|--------|----------------|--------|------|------|---------|---------|----------|----------|
| Sex    | Race/ethnicity | Income | Mean | SE   | Mean    | SE      | Mean     | SE       |
| Male   | Hispanic       | Low    | 0.37 | 0.06 | 0.80    | 0.04    | 0.65     | 0.07     |
|        |                | Middle | 0.16 | 0.08 | 0.65    | 0.09    | 0.69     | 0.09     |
|        |                | High   | 0.11 | 0.09 | 0.63    | 0.13    | 0.63     | 0.13     |
|        | NH White       | Low    | 0.34 | 0.07 | 0.64    | 0.06    | 0.63     | 0.10     |
|        |                | Middle | 0.01 | 0.01 | 0.55    | 0.07    | 0.72     | 0.09     |
|        |                | High   | 0.16 | 0.06 | 0.45    | 0.06    | 0.57     | 0.06     |
|        | NH Black       | Low    | 0.24 | 0.04 | 0.61    | 0.05    | 0.53     | 0.06     |
|        |                | Middle | 0.14 | 0.08 | 0.59    | 0.08    | 0.54     | 0.09     |
|        |                | High   | 0.39 | 0.14 | 0.68    | 0.10    | 0.39     | 0.08     |
| Female | Hispanic       | Low    | 0.28 | 0.06 | 0.77    | 0.05    | 0.68     | 0.06     |
|        |                | Middle | 0.27 | 0.09 | 0.65    | 0.08    | 0.76     | 0.09     |
|        |                | High   | 0.08 | 0.06 | 0.23    | 0.08    | 0.65     | 0.16     |
|        | NH White       | Low    | 0.21 | 0.07 | 0.51    | 0.06    | 0.78     | 0.06     |
|        |                | Middle | 0.09 | 0.05 | 0.39    | 0.08    | 0.69     | 0.09     |
|        |                | High   | 0.07 | 0.04 | 0.45    | 0.07    | 0.41     | 0.07     |
|        | NH Black       | Low    | 0.32 | 0.05 | 0.57    | 0.06    | 0.72     | 0.05     |
|        |                | Middle | 0.23 | 0.10 | 0.41    | 0.08    | 0.56     | 0.08     |
|        |                | High   | 0.01 | 0.01 | 0.34    | 0.10    | 0.54     | 0.10     |

\*Estimates obtained from NHANES

**eTable 4. Baseline Dental Utilization**

|        |                |        | <6    | <6   | 6 to 12 | 6 to 12 | 13 to 19 | 13 to 19 |
|--------|----------------|--------|-------|------|---------|---------|----------|----------|
| Sex    | Race/ethnicity | Income | Mean  | SE   | Mean    | SE      | Mean     | SE       |
| Male   | Hispanic       | Low    | 15.65 | 0.46 | 40.20   | 1.84    | 72.49    | 2.14     |
|        |                | Middle | 13.77 | 0.76 | 41.22   | 2.15    | 72.21    | 2.25     |
|        |                | High   | 14.66 | 0.77 | 36.20   | 3.11    | 75.35    | 4.58     |
|        | NH White       | Low    | 14.48 | 0.48 | 33.71   | 1.30    | 73.14    | 2.36     |
|        |                | Middle | 15.01 | 0.62 | 37.86   | 2.08    | 78.18    | 4.82     |
|        |                | High   | 14.80 | 0.44 | 36.27   | 1.23    | 74.33    | 2.23     |
|        | NH Black       | Low    | 15.36 | 0.50 | 35.30   | 1.25    | 76.48    | 2.45     |
|        |                | Middle | 14.09 | 1.35 | 40.93   | 2.24    | 75.23    | 2.62     |
|        |                | High   | 15.45 | 0.90 | 34.11   | 2.86    | 78.35    | 3.13     |
| Female | Hispanic       | Low    | 14.40 | 0.38 | 38.88   | 1.40    | 60.63    | 2.19     |
|        |                | Middle | 13.79 | 0.65 | 46.19   | 2.93    | 65.50    | 5.13     |
|        |                | High   | 10.40 | 0.83 | 40.34   | 3.16    | 59.69    | 3.65     |

|  |          |        |       |      |       |      |       |      |
|--|----------|--------|-------|------|-------|------|-------|------|
|  | NH White | Low    | 14.00 | 0.43 | 40.27 | 2.37 | 66.85 | 2.33 |
|  |          | Middle | 14.16 | 0.53 | 39.27 | 1.96 | 64.12 | 3.89 |
|  |          | High   | 14.00 | 0.53 | 38.09 | 1.65 | 65.52 | 3.37 |
|  | NH Black | Low    | 15.05 | 0.53 | 39.06 | 1.61 | 70.35 | 2.41 |
|  |          | Middle | 13.30 | 0.57 | 40.37 | 2.10 | 67.13 | 2.03 |
|  |          | High   | 15.28 | 0.70 | 43.35 | 2.30 | 68.66 | 4.17 |

\*Estimates obtained from NHANES

## References

1. Ramsey S, Willke R, Briggs A, et al. Good research practices for cost-effectiveness analysis alongside clinical trials: the ISPOR RCT-CEA Task Force report. *Value Health*. 2005;8(5):521-533.
2. Fleming E, Afful J. Prevalence of Total and Untreated Dental Caries Among Youth: United States, 2015-2016. *NCHS Data Brief*. 2018(307):1-8.
3. Monte-Santo AS, Viana SVC, Moreira KMS, Imparato JCP, Mendes FM, Bonini G. Prevalence of early loss of primary molar and its impact in schoolchildren's quality of life. *Int J Paediatr Dent*. 2018;28(6):595-601.
4. Azodo CC, Chukwumah NM, Ezeja EB. Dentoalveolar abscess among children attending a dental clinic in Nigeria. *Odontostomatol Trop*. 2012;35(139):41-46.
5. Health Resources and Services Administration (HRSA). Justification of Estimates for Appropriations Committees <https://www.hrsa.gov/sites/default/files/hrsa/about/budget/budget-justification-fy2022.pdf>. Published 2022. Accessed Feb 6, 2022.
6. Guarnizo-Herreno CC, Wehby GL. Dentist supply and children's oral health in the United States. *Am J Public Health*. 2014;104(10):e51-57.
7. Heidenreich JF, Kim AS, Scott JM, Chi DL. Pediatric Dentist Density and Preventive Care Utilization for Medicaid Children. *Pediatr Dent*. 2015;37(4):371-375.
8. Institute for Health Metrics and Evaluation (IHME). Global Burden of Disease Study 2019 (GBD 2019) Disability Weights. <https://ghdx.healthdata.org/record/ihme-data/gbd-2019-disability-weights#:~:text=Disability%20weights%2C%20which%20represent%20the,health%20and%201%20equals%20death>. Published 2019. Accessed Jan 2, 2022.
9. Brennan DS, Spencer AJ. Disability weights for the burden of oral disease in South Australia. *Popul Health Metr*. 2004;2(1):7.
10. American Dental Association. Survey of Dental Fees. <https://success.ada.org/en/practice-management/finances/survey-of-dental-fees>. Published 2022. Accessed Feb 13, 2019.
11. Atkins CY, Thomas TK, Lenaker D, Day GM, Hennessy TW, Meltzer MI. Cost-effectiveness of preventing dental caries and full mouth dental reconstructions among Alaska Native children in the Yukon-Kuskokwim delta region of Alaska. *J Public Health Dent*. 2016;76(3):228-240.
12. Humana. Cost of common dental procedures. <https://www.humana.com/dental-insurance/dental-resources/cost-of-dental-procedures>. Published 2022. Accessed Jan 5, 2022.
13. Kay E, Owen L, Taylor M, Claxton L, Sheppard L. The use of cost-utility analysis for the evaluation of caries prevention: an exploratory case study of two community-based public health interventions in a high-risk population in the UK. *Community Dent Health*. 2018;35(1):30-36.
14. Wehby GL, Shane DM, Joshi A, et al. The Effects of Distance to Dentists and Dentist Supply on Children's Use of Dental Care. *Health Serv Res*. 2017;52(5):1817-1834.
15. UnitedHealthcare. Dental Fee Schedule. <https://vaccnprovidertemplate.logisticshealth.com/trainingdocs/VACCN-ProvTrng-DentalFeeSchedule.pdf>. Published 2020. Accessed May 15, 2022.
