# Supplementary material for: Cost-effectiveness of Dental Workforce Expansion Through the National Health Service Corps and Its Association With Oral Health Outcomes Among US Children
Source: PubMed Central journal article supplement (PMC10024205; doi:10.1001/jamahealthforum.2023.0128), 2023-03-17
Supplement: jamahealthforum-e230128-s002.pdf [file jamahealthforum-e230128-s002.pdf]

## Data Sharing Statement

Choi. Cost-Effectiveness of Dental Workforce Expansion Through the National Health Service Corps and Its Association With Oral Health Outcomes Among US Children. *JAMA Health Forum*. Published March 17, 2023. doi:10.1001/jamahealthforum.2023.0128

### Data

**Data available:** No

### Additional Information

**Explanation for why data not available:** Data sharing is not applicable to this study as no new data were collected or created.
